# Supplementary material
Source: PubMed Central journal article supplement (PMC1456875)
Supplement: plntcell_tpc.105.039834_3.pdf [file plntcell_tpc.105.039834_3.pdf]

**Supplemental Figure 3: Expression of *FT* in leaves of amiR-ft overexpressers.**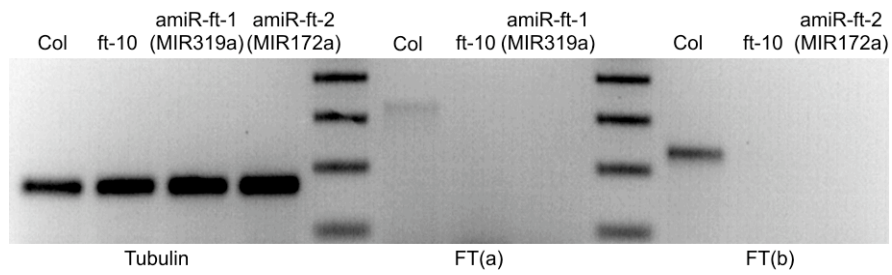

Oligonucleotides used (5' to 3'):

|         |           |                                     |
|---------|-----------|-------------------------------------|
| Tubulin | sense     | GAG CCT TAC AAC GCT ACT CTG TCT GTC |
|         | antisense | ACA CCA GAC ATA GTA GCA GAA ATC AAG |
| FT(a)   | sense     | GGT GGA GAA GAC CTC AGG AA          |
|         | antisense | CAA TTG TAG AAA ACT GCG GC          |
| FT(b)   | sense     | TGG CCG CAG TTT TCT ACA AT          |
|         | antisense | CTC ATT TTC CTC CCC CTC TC          |
