# Supplementary material
Source: PubMed Central journal article supplement (PMC1456875)
Supplement: plntcell_tpc.105.039834_11.pdf [file plntcell_tpc.105.039834_11.pdf]

**Supplemental Table 7: Summary of downregulated genes with seed matches to amiRNAs.**

|                                                                                  | amiR-lfy-1 | amiR-mads-1 | amiR-mads-2 |
|----------------------------------------------------------------------------------|------------|-------------|-------------|
| Predicted targets, present on array                                              | 1          | 6           | 18          |
| Predicted targets, present in control                                            | 1          | 4           | 13          |
| Predicted targets, present in control and downregulated in amiRNA overexpressers | 1          | 1           | 6           |
| All genes present in control without predicted targets                           | 15367      | 15364       | 15355       |
| All genes downregulated without predicted targets                                | 342        | 141         | 287         |
| Genes with seed matches, present in control, without predicted targets           | 1562       | 2970        | 2986        |
| Observed downregulated                                                           |            |             |             |
| Predicted targets                                                                | 1          | 1           | 5           |
| Others                                                                           | 21         | 27          | 55          |
| Expected downregulated without predicted targets                                 | 34.8       | 27.3        | 55.8        |
| $\chi^2$                                                                         | 5.57       | 0.003       | 0.62        |

Downregulated genes among all genes with seed matches to the respective amiRNA. Analysis as in Table 2, using LIMMA and 1% estimated FDR. A  $\chi^2$  test was used to determine statistical significance of the difference between expected and observed downregulated genes among the “non-targets”. A minimal  $\chi^2$  value of 6.63 corresponds to significant differences at  $\alpha = 0.01$ . Use of the logit-T algorithm produced qualitatively similar results (not shown). For amiR-lfy-1, we used the sequence of the 21mer deduced from the mapping of the cleavage product, which was shifted by 2 nucleotides from the intended amiRNA.
